# Supplementary material for: Standard deviation of pulse pressure measured using wearable devices improves the estimation of acute psychological stress
Source: Research Square preprint supplement (doi:10.21203/rs.3.rs-5800916/v1), 2025-08-08
Supplement: Supplementary file 1 [file c83fff69347caa5146f72bb0.docx]

**Supplementary information**

Table S-1. Demography of Participants

|  | Control group | Stress group |
| --- | --- | --- |
| Sample size | 57 | 57 |
| Age, mean ± *SD* | 44.5±9.6 | 44.9±11.0 |
| Body height, mean ± *SD* | 166.5±8.7 | 163.8±9.7 |
| Weight, mean ± *SD* | 60.5±14.2 | 59.5±13.3 |
| Sex, n (%) | | |
| Men | 28(49) | 28(49) |
| Women | 29(51) | 29(51) |
| Health status, n (%) | | |
| Good | 32(56) | 33(58) |
| Normal | 24(42) | 22(39) |
| Bad | 1(2) | 2(3) |
| Medication taking, n (%) | | |
| Yes | 3(5) | 4(7) |
| None | 54(95) | 53(93) |
| Pre-existing disease, n (%) | | |
| Yes | 2(4) | 2(4) |
| None | 55(96) | 55(96) |
| Smoking status, n (%) | | |
| Yes | 2(4) | 5(9) |
| None | 55(96) | 52(91) |

Table S-2 Comparison between Stress Group and Control Group in Each Situation

| Index | Situation | Sample size | | *W* | *p* value | *rrb* | 95% CI | |
| --- | --- | --- | --- | --- | --- | --- | --- | --- |
| Stress group | Control group |
| SDPP | Baseline | 57 | 57 | 1579 | 0.799 | -0.03 | -0.24 | 0.18 |
| Load | 57 | 57 | 339 | 0.003 | -0.79 | -0.86 | -0.70 |
| Recovery | 57 | 57 | 1372 | 0.306 | -0.16 | -0.35 | 0.06 |
| HR | Baseline | 57 | 55 | 1782 | 0.426 | 0.14 | -0.08 | 0.34 |
| Load | 57 | 55 | 881 | 0.003 | -0.44 | -0.59 | -0.25 |
| Recovery | 57 | 55 | 1567 | 1.000 | 0.00 | -0.21 | 0.21 |
| LF/HF | Baseline | 53 | 50 | 1618 | 0.162 | 0.22 | -0.01 | 0.40 |
| Load | 54 | 49 | 1043 | 0.162 | -0.21 | -0.41 | -0.01 |
| Recovery | 54 | 48 | 1217 | 0.599 | -0.06 | -0.28 | 0.16 |
| HF | Baseline | 54 | 51 | 1083 | 0.180 | -0.21 | -0.41 | 0.01 |
| Load | 54 | 51 | 1120 | 0.512 | -0.13 | -0.34 | -0.09 |
| Recovery | 54 | 50 | 1191 | 0.512 | -0.19 | -0.33 | 0.10 |
| Cortisol | Baseline | 56 | 57 | 1574 | 0.902 | -0.01 | -0.22 | 0.20 |
| Load | 57 | 56 | 812 | 0.002 | -0.49 | -0.64 | -0.31 |
| Recovery | 57 | 56 | 825 | 0.002 | -0.48 | -0.63 | -0.30 |
| POMS2(AH) | Baseline | 57 | 57 | 1479 | 0.404 | -0.09 | -0.29 | 0.12 |
| Load | 57 | 57 | 1297 | 0.186 | -0.20 | -0.40 | 0.01 |
| Recovery | 57 | 57 | 1912 | 0.198 | 0.18 | -0.03 | 0.37 |
| POMS2(CB) | Baseline | 57 | 57 | 1722 | 1.000 | 0.06 | -0.15 | 0.27 |
| Load | 57 | 57 | 472 | 0.003 | -0.71 | -0.80 | -0.59 |
| Recovery | 57 | 57 | 1723 | 1.000 | 0.06 | -0.15 | 0.27 |
| POMS2(DD) | Baseline | 57 | 57 | 1606 | 0.916 | -0.01 | -0.22 | 0.20 |
| Load | 57 | 57 | 1135 | 0.015 | -0.30 | -0.48 | -0.10 |
| Recovery | 57 | 57 | 1804 | 0.606 | 0.11 | -0.10 | 0.31 |
| POMS2(FI) | Baseline | 57 | 57 | 1736 | 0.528 | 0.07 | -0.14 | 0.27 |
| Load | 57 | 57 | 924 | 0.003 | -0.43 | -0.59 | -0.24 |
| Recovery | 57 | 57 | 1907 | 0.218 | 0.17 | -0.04 | 0.37 |
| POMS2(TA) | Baseline | 57 | 57 | 1658 | 0.851 | 0.02 | -0.19 | 0.23 |
| Load | 57 | 57 | 576 | 0.003 | -0.65 | -0.75 | -0.50 |
| Recovery | 57 | 57 | 1984 | 0.078 | 0.22 | 0.01 | 0.41 |
| POMS2(VA) | Baseline | 57 | 57 | 1456 | 0.680 | -0.10 | -0.31 | 0.11 |
| Load | 57 | 57 | 1487 | 0.680 | -0.09 | -0.29 | -0.13 |
| Recovery | 57 | 57 | 1407 | 0.651 | -0.13 | -0.34 | 0.08 |
| POMS2(F) | Baseline | 57 | 57 | 1635 | 1.000 | 0.01 | -0.20 | 0.22 |
| Load | 57 | 57 | 1729 | 1.000 | 0.06 | -0.15 | 0.27 |
| Recovery | 57 | 57 | 1693 | 1.000 | 0.04 | -0.17 | 0.25 |
| POMS2(TMD) | Baseline | 57 | 57 | 1739 | 0.519 | 0.07 | -0.14 | 0.28 |
| Load | 57 | 57 | 784 | 0.003 | -0.52 | -0.66 | -0.35 |
| Recovery | 57 | 57 | 1950 | 0.132 | 0.20 | -0.01 | 0.39 |
| STAI(State Anxiety) | Baseline | 57 | 57 | 1641 | 0.930 | 0.01 | -0.20 | 0.22 |
| Load | 57 | 57 | 731 | 0.003 | -0.55 | -0.68 | -0.39 |
| Recovery | 57 | 57 | 1896 | 0.248 | 0.17 | -0.04 | 0.36 |

Note: SDPP, Standard deviation of pulse pressure; HR, heart rate; HF, high frequency component of heart rate variability; LF: low frequency component of heart rate variability; POMS2: psychological assessment scale used to evaluate fatigue and mood status. The POMS2 assesses seven domains: Anger-Hostility (AH), Confusion-Bewilderment (CB), Depression-Dejection (DD), Fatigue-Inertia (FI), Tension-Anxiety (TA), Vigour-Activity (VA), and Friendliness (F), and the Total Mood Disturbance (TMD) score is calculated using the formula: TMD = (AH + CB + DD + FI + TA) - VA. STAI (State Anxiety): a separate self-reported rating scale that measures the anxiety concept of state anxiety (how the participant is feeling "at this moment"). *rrb* rank-biserial correlation coefficient. 95%CI: 95% confidence interval (CI) of *rrb*. Mann-Whitney U-tests were used for comparison between groups for each of Situation (Baseline), Situation(Load) and Situation (Recovery), and multiple comparison correction using the Holm method was performed to compare these three situations.

Table S3 Comparison in situations in each group (Stress group and Control group)

| Index | situation | Group | Sample size | *W* | *p* value | *rrb* | 95% CI, | |
| --- | --- | --- | --- | --- | --- | --- | --- | --- |
| SDPP | Baseline  vs  Load | Stress | 57 vs 57 | 11 | 0.002 | -0.99 | -0.99 | -0.98 |
| Control | 57 vs 57 | 762 | 0.926 | -0.08 | -0.36 | 0.22 |
| Baseline  vs  Recovery | Stress | 57 vs 57 | 368 | 0.006 | -0.55 | -0.73 | -0.32 |
| Control | 57 vs 57 | 598 | 0.008 | -0.28 | -0.52 | 0.01 |
| Load  vs  Recovery | Stress | 57 vs 57 | 1608 | 0.002 | 0.95 | 0.90 | 0.97 |
| Control | 57 vs 57 | 527 | 0.010 | -0.36 | -0.59 | -0.08 |
| HR | Baseline  vs  Load | Stress | 57 vs 57 | 33 | 0.002 | -0.96 | -0.98 | -0.93 |
| Control | 55 vs 55 | 1217 | 0.013 | 0.58 | 0.34 | 0.75 |
| Baseline  vs  Recovery | Stress | 57 vs 57 | 962 | 0.542 | 0.16 | -0.13 | 0.43 |
| Control | 55 vs 55 | 1398 | 0.002 | 0.82 | 0.69 | 0.90 |
| Load  vs  Recovery | Stress | 57 vs 57 | 1648 | 0.001 | 0.99 | 0.99 | 1.00 |
| Control | 55 vs 55 | 1327 | 0.001 | 0.79 | 0.64 | 0.88 |
| LF/HF | Baseline  vs  Load | Stress | 53 vs 54 | 213 | 0.002 | -0.70 | -0.83 | -0.51 |
| Control | 50 vs 49 | 412 | 0.156 | -0.33 | -0.58 | -0.02 |
| Baseline  vs  Recovery | Stress | 53 vs 54 | 175 | 0.002 | -0.75 | -0.85 | -0.57 |
| Control | 50 vs 48 | 246 | 0.002 | -0.58 | -0.76 | -0.33 |
| Load  vs  Recovery | Stress | 54 vs 54 | 801 | 0.634 | 0.08 | -0.22 | 0.37 |
| Control | 49 vs 48 | 490 | 0.172 | -0.17 | -0.46 | 0.16 |
| HF | Baseline  vs  Load | Stress | 54 vs 54 | 919 | 0.154 | 0.24 | -0.06 | 0.50 |
| Control | 51 vs 51 | 454 | 0.154 | -0.29 | -0.55 | 0.02 |
| Baseline  vs  Recovery | Stress | 54 vs 54 | 702 | 0.731 | -0.05 | -0.35 | 0.25 |
| Control | 51 vs 50 | 233 | 0.002 | -0.64 | -0.79 | -0.41 |
| Load  vs  Recovery | Stress | 54 vs 54 | 591 | 0.194 | -0.20 | -0.47 | 0.10 |
| Control | 51 vs 50 | 306 | 0.002 | -0.52 | -0.71 | -0.25 |
| Cortisol | Baseline  vs  Load | Stress | 56 vs 57 | 213 | 0.002 | -0.70 | -0.83 | -0.52 |
| Control | 57 vs 56 | 1176 | 0.002 | 0.71 | 0.52 | 0.83 |
| Baseline  vs  Recovery | Stress | 56 vs 57 | 585 | 0.202 | -0.27 | -0.52 | 0.03 |
| Control | 57 vs 56 | 1356 | 0.002 | 0.83 | 0.70 | 0.90 |
| Load  vs  Recovery | Stress | 57 vs 57 | 1370 | 0.002 | 0.66 | 0.45 | 0.80 |
| Control | 56 vs 56 | 1087 | 0.007 | 0.58 | 0.34 | 0.75 |
| POMS2(AH) | Baseline  vs  Load | Stress | 57 vs 57 | 256 | 0.152 | -0.41 | -0.62 | -0.13 |
| Control | 57 vs 57 | 309 | 0.380 | 0.10 | -0.19 | 0.38 |
| Baseline  vs  Recovery | Stress | 57 vs 57 | 353 | 0.010 | 0.62 | 0.40 | 0.77 |
| Control | 57 vs 57 | 307 | 0.660 | 0.16 | -0.13 | 0.43 |
| Load  vs  Recovery | Stress | 57 vs 57 | 620 | 0.002 | 0.86 | 0.76 | 0.92 |
| Control | 57 vs 57 | 172 | 0.660 | -0.02 | -0.31 | 0.27 |
| POMS2(CB) | Baseline  vs  Load | Stress | 57 vs 57 | 4 | 0.002 | -0.99 | -1.00 | -0.99 |
| Control | 57 vs 57 | 539 | 0.041 | 0.38 | 0.10 | 0.60 |
| Baseline  vs  Recovery | Stress | 57 vs 57 | 371 | 0.248 | 0.41 | 0.13 | 0.62 |
| Control | 57 vs 57 | 642 | 0.030 | 0.30 | 0.01 | 0.54 |
| Load  vs  Recovery | Stress | 57 vs 57 | 1525 | 0.002 | 0.98 | 0.96 | 0.99 |
| Control | 57 vs 57 | 202 | 0.696 | -0.07 | -0.36 | 0.22 |
| POMS2(DD) | Baseline  vs  Load | Stress | 57 vs 57 | 181 | 0.002 | -0.60 | -0.76 | -0.37 |
| Control | 57 vs 57 | 374 | 0.926 | 0.33 | 0.05 | 0.57 |
| Baseline  vs  Recovery | Stress | 57 vs 57 | 427 | 0.006 | 0.62 | 0.40 | 0.77 |
| Control | 57 vs 57 | 395 | 0.008 | 0.50 | 0.24 | 0.69 |
| Load  vs  Recovery | Stress | 57 vs 57 | 759 | 0.002 | 0.94 | 0.90 | 0.97 |
| Control | 57 vs 57 | 266 | 0.010 | 0.22 | -0.07 | 0.48 |
| POMS2(FI) | Baseline  Vs  Load | Stress | 57 vs 57 | 92 | 0.002 | -0.87 | -0.92 | -0.77 |
| Control | 57 vs 57 | 450 | 0.959 | -0.17 | -0.44 | 0.13 |
| Baseline  vs  Recovery | Stress | 57 vs 57 | 375 | 0.162 | -0.13 | -0.40 | 0.17 |
| Control | 57 vs 57 | 338 | 0.144 | -0.37 | -0.60 | -0.10 |
| Load  vs  Recovery | Stress | 57 vs 57 | 1191 | 0.002 | 0.87 | 0.77 | 0.93 |
| Control | 57 vs 57 | 246 | 0.080 | -0.43 | -0.64 | -0.16 |
| POMS2(TA) | Baseline  vs  Load | Stress | 57 vs 57 | 67 | 0.002 | -0.91 | -0.95 | -0.84 |
| Control | 57 vs 57 | 830 | 0.006 | 0.47 | 0.21 | 0.67 |
| Baseline  vs  Recovery | Stress | 57 vs 57 | 792 | 0.001 | 0.84 | 0.73 | 0.91 |
| Control | 57 vs 57 | 898 | 0.001 | 0.66 | 0.46 | 0.80 |
| Load  vs  Recovery | Stress | 57 vs 57 | 1480 | 0.002 | 0.99 | 0.99 | 1.00 |
| Control | 57 vs 57 | 336 | 0.182 | 0.45 | 0.18 | 0.65 |
| POMS2(VA) | Baseline  vs  Load | Stress | 57 vs 57 | 1028 | 0.005 | 0.49 | 0.24 | 0.68 |
| Control | 57 vs 57 | 671 | 0.002 | 0.64 | 0.43 | 0.78 |
| Baseline  vs  Recovery | Stress | 57 vs 57 | 630 | 0.045 | 0.27 | -0.02 | 0.52 |
| Control | 57 vs 57 | 639 | 0.004 | 0.41 | 0.14 | 0.63 |
| Load  vs  Recovery | Stress | 57 vs 57 | 407 | 0.824 | -0.25 | -0.50 | 0.05 |
| Control | 57 vs 57 | 286 | 0.824 | -0.04 | -0.32 | 0.25 |
| POMS2(F) | Baseline  vs  Load | Stress | 57 vs 57 | 1005 | 0.002 | 0.64 | 0.43 | 0.78 |
| Control | 57 vs 57 | 916 | 0.003 | 0.62 | 0.41 | 0.77 |
| Baseline  vs  Recovery | Stress | 57 vs 57 | 650 | 0.010 | 0.51 | 0.26 | 0.70 |
| Control | 57 vs 57 | 829 | 0.019 | 0.53 | 0.29 | 0.71 |
| Load  vs  Recovery | Stress | 57 vs 57 | 280 | 0.502 | -0.20 | -0.47 | 0.09 |
| Control | 57 vs 57 | 364 | 0.502 | -0.16 | -0.43 | 0.14 |
| POMS2(TMD) | Baseline  vs  Load | Stress | 57 vs 57 | 64 | 0.002 | -0.92 | -0.96 | -0.86 |
| Control | 57 vs 57 | 732 | 0.406 | 0.06 | -0.23 | 0.35 |
| Baseline  vs  Recovery | Stress | 57 vs 57 | 772 | 0.210 | 0.37 | 0.09 | 0.60 |
| Control | 57 vs 57 | 710 | 0.525 | 0.03 | -0.26 | 0.32 |
| Load  vs  Recovery | Stress | 57 vs 57 | 1538 | 0.002 | 0.93 | 0.87 | 0.96 |
| Control | 57 vs 57 | 606 | 0.845 | -0.01 | -0.30 | 0.28 |
| STAI  (State Anxiety) | Baseline  vs  Load | Stress | 57 vs 57 | 68 | 0.002 | -0.91 | -0.95 | -0.85 |
| Control | 57 vs 57 | 556 | 0.181 | -0.19 | -0.46 | 0.10 |
| Baseline  vs  Recovery | Stress | 57 vs 57 | 947 | 0.503 | 0.37 | 0.09 | 0.60 |
| Control | 57 vs 57 | 767 | 0.503 | -0.04 | -0.33 | 0.25 |
| Load  vs  Recovery | Stress | 57 vs 57 | 1437 | 0.002 | 0.93 | 0.88 | 0.96 |
| Control | 57 vs 57 | 835 | 0.503 | 0.21 | -0.08 | 0.47 |

Note: *rrb*: rank-biserial correlation coefficient. 95%CI: 95% confidence interval (CI) of *rrb.* For each index, the Conover test was used to compare the Situation(Baseline), Situation(Load), and Situation(Recovery) in each group, and multiple comparison correction was performed using Holm method for comparison between these three conditions.


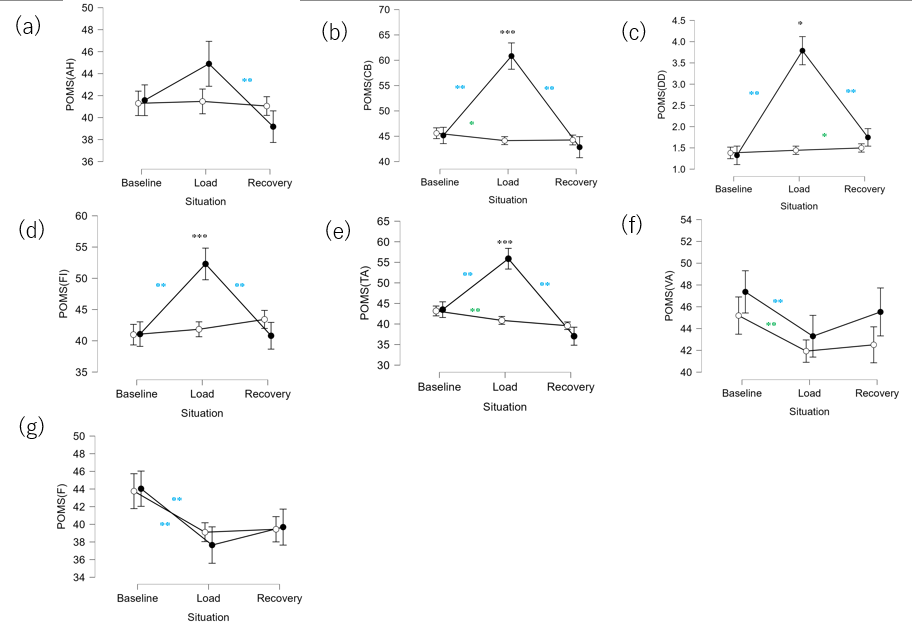


Figure S1. Inter-group comparisons for each of the items (POMS2: Anger- Hostility [AH], Confusion-Bewilderment [CB], Depression-Dejection [DD], Fatigue-Inertia [FI], Tension-Anxiety [TA], Vigour- Activity [VA], and Friendliness [F]) in each Situation. ● indicates the Stress group and ○ indicates the Control group. (a) POMS2 (AH); (b) POMS2 (CB); (c) POMS2 (DD); (d) POMS2 (FI); (e) POMS 2(TA); (f) POMS2 (VA); (g) POMS2 (F). ****p* < 0.001, ***p* < 0.01, **p* < 0.05; Comparisons between Situations in the Stress and Control groups are shown in black; the comparison between Baseline and Load and between Load and Recovery in the Stress group are shown in blue; the comparison between Baseline and Load, and between Load and Recovery in the Control group is shown in green.

Table S4. Odds ratio of logistic regression model (H0, H1) with difference between groups as the response variable (Load)

|  |  |  | **H0 model** | | | |  |  |  | **H1 model** | | | |
| --- | --- | --- | --- | --- | --- | --- | --- | --- | --- | --- | --- | --- | --- |
|  |  |  | **Odds Ratio** |  | **95% Confidence interval** | |  |  |  | **Odds Ratio** |  | **95% Confidence interval** | |
|  |  |  |  | **(odds ratio scale)** | |  |  |  |  | **(odds ratio scale)** | |
|  |  |  |  | **Lower bound** | **Upper bound** |  |  |  |  | **Lower bound** | **Upper bound** |
| **Coefficients** | |  |  |  |  |  |  |  |  |  |  |  |  |
|  | **Intercept** |  | 8.01×10-6 |  | 0.00 | 0.01 |  |  |  | 8.66×10-5 |  | 0.00 | 0.22 |
|  | **SDPP Load** |  | - |  | - | - |  |  |  | 4.83 |  | 2.27 | 10.26 |
|  | **HR Load** |  | 1.08 |  | 1.03 | 1.14 |  |  |  | 1.03 |  | 0.97 | 1.09 |
|  | **LF/HF Load** |  | 1.13 |  | 0.90 | 1.42 |  |  |  | 1.08 |  | 0.82 | 1.42 |
|  | **HF Load** |  | 1.00 |  | 1.00 | 1.01 |  |  |  | 1.00 |  | 1.00 | 1.01 |
|  | **Cortisol Load** |  | 1.37 |  | 1.12 | 1.67 |  |  |  | 1.43 |  | 1.10 | 1.85 |
|  | **Age** |  | 1.07 |  | 1.00 | 1.13 |  |  |  | 1.05 |  | 0.98 | 1.13 |
|  | **Gender** |  | 0.56 |  | 0.20 | 1.59 |  |  |  | 0.49 |  | 0.12 | 2.01 |
|  | **BMI** |  | 1.02 |  | 0.90 | 1.16 |  |  |  | 0.96 |  | 0.80 | 1.15 |

Note: The null model (H0) included HR, LF/HF, HF, cortisol, age, gender, and BMI as explanatory variables, and the alternative model (H1) included SDPP in addition to the explanatory variables in the null model. The sample sizes for each are: H0 model = 102, H1 model = 102.

Table S5. Comparison of logistic regression models (H0, H1) with difference between groups as the response variable and the results of estimated coefficients (Baseline)

|  |  |  | **Ho model** | | |  |  | **H1 model** | | |
| --- | --- | --- | --- | --- | --- | --- | --- | --- | --- | --- |
|  |  |  | **Estimate** |  | ***SE*** |  |  | **Estimate** |  | ***SE*** |
| **Coefficients** | |  |  |  |  |  |  |  |  |  |
|  | **Intercept** |  | 0.28 | ** | 2.63 |  |  | 0.27 | ** | 2.68 |
|  | **SDPP Baseline** |  | - |  | - |  |  | -0.01 |  | 0.31 |
|  | **HR Baseline** |  | -0.03 |  | 0.02 |  |  | -0.03 |  | 0.02 |
|  | **LF/HF Baseline** |  | -0.02 |  | 0.13 |  |  | -0.02 |  | 0.13 |
|  | **HF Baseline** |  | 0.00 |  | 0.00 |  |  | 0.00 |  | 0.00 |
|  | **Cortisol Baseline** |  | 0.02 |  | 0.07 |  |  | 0.02 |  | 0.07 |
|  | **Age** |  | 0.02 |  | 0.03 |  |  | 0.02 |  | 0.03 |
|  | **Gender** |  | -0.14 |  | 0.44 |  |  | -0.15 |  | 0.45 |
|  | **BMI** |  | 0.04 |  | 0.06 |  |  | 0.04 |  | 0.06 |
| **Model Summary** | |  |  |  |  |  |  |  |  |  |
|  | **Deviance** |  | 134.48 |  |  |  |  | 134.48 |  |  |
|  | **AIC** |  | 150.48 |  |  |  |  | 152.48 |  |  |
|  | **BIC** |  | 171.48 |  |  |  |  | 176.11 |  |  |
|  | ***df*** |  | 94 |  |  |  |  | 93 |  |  |
|  | ***Χ²*** |  | - |  |  |  |  | 0.00 |  |  |
|  | ***p*** |  | - |  |  |  |  | 0.986 |  |  |
|  | **McFadden *R²*** |  | - |  |  |  |  | 2.41×10-6 |  |  |
| **Performance** | |  |  |  |  |  |  |  |  |  |
|  | **Accuracy** |  | 0.55 |  |  |  |  | 0.55 |  |  |
|  | **AUC** |  | 0.61 |  |  |  |  | 0.61 |  |  |
|  | **Sensitivity** |  | 0.56 |  |  |  |  | 0.56 |  |  |
|  | **Specificity** |  | 0.54 |  |  |  |  | 0.54 |  |  |

Note: The null model (H0) included HR, LF/HF, HF, cortisol, age, gender, and BMI as explanatory variables, and the alternative model (H1) included SDPP in addition to the explanatory variables in the null model. *SE* = standard error; AIC = Akaike information criterion; BIC = Bayesian information criterion. ****p* < 0.001, ***p* < 0.01, **p* < 0.05.　 The sample sizes for each are as follows: H0 model = 102, H1 model = 102.

Table S6. Odds ratio of logistic regression models (H0, H1) with difference between groups as the response variable (Baseline)

|  |  |  | **H0 model** | | | |  |  | **H1 model** | | | |
| --- | --- | --- | --- | --- | --- | --- | --- | --- | --- | --- | --- | --- |
|  |  |  | **Odds Ratio** |  | **95% Confidence interval** | |  |  | **Odds Ratio** |  | **95% Confidence interval** | |
|  |  |  |  | **(odds ratio scale)** | |  |  |  | **(odds ratio scale)** | |
|  |  |  |  | **Lower bound** | **Upper bound** |  |  |  | **Lower bound** | **Upper bound** |
| **Coefficients** | |  |  |  |  |  |  |  |  |  |  |  |
|  | **Intercept** |  | 1.32 |  | 0.01 | 228.00 |  |  | 1.31 |  | 0.01 | 250.70 |
|  | **SDPP Baseline** |  | - |  | - | - |  |  | 0.99 |  | 0.54 | 1.84 |
|  | **HR** **Baseline** |  | 0.97 |  | 0.93 | 1.02 |  |  | 0.97 |  | 0.93 | 1.02 |
|  | **LF/HF Baseline** |  | 0.98 |  | 0.76 | 1.26 |  |  | 0.98 |  | 0.76 | 1.27 |
|  | **HF** **Baseline** |  | 1.00 |  | 1.00 | 1.00 |  |  | 1.00 |  | 1.00 | 1.00 |
|  | **Cortisol Baseline** |  | 1.02 |  | 0.89 | 1.16 |  |  | 1.02 |  | 0.89 | 1.16 |
|  | **Age** |  | 1.02 |  | 0.97 | 1.07 |  |  | 1.02 |  | 0.96 | 1.07 |
|  | **Gender** |  | 0.87 |  | 0.37 | 2.04 |  |  | 0.87 |  | 0.36 | 2.07 |
|  | **BMI** |  | 1.04 |  | 0.92 | 1.17 |  |  | 1.04 |  | 0.92 | 1.17 |

Note: The null model (H0) included HR, LF/HF, HF, cortisol, age, gender, and BMI as explanatory variables, and the alternative model (H1) included SDPP in addition to the explanatory variables in the null model. The sample sizes for each are as follows: H0 model = 102, H1 model = 102.

Table S7. Comparisons of logistic regression models (H0, H1) with difference between groups as the response variable and the results of estimated coefficients (Recovery)

|  |  |  | **Ho model** | | |  |  | **H1 model** | | |
| --- | --- | --- | --- | --- | --- | --- | --- | --- | --- | --- |
|  |  |  | **Estimate** |  | ***SE*** |  |  | **Estimate** |  | ***SE*** |
| **Coefficients** | |  |  |  |  |  |  |  |  |  |
|  | **Intercept** |  | -2.83 | ** | 2.96 |  |  | -2.20 |  | 3.01 |
|  | **SDPP Recovery** |  | - |  | - |  |  | 0.53 |  | 0.29 |
|  | **HR Recovery** |  | 0.00 |  | 0.03 |  |  | -0.02 |  | 0.03 |
|  | **LF/HF Recovery** |  | 0.14 |  | 0.11 |  |  | 0.14 |  | 0.12 |
|  | **HF Recovery** |  | 0.00 |  | 0.00 |  |  | 0.00 |  | 0.00 |
|  | **Cortisol Recovery** |  | 0.33 | ** | 0.11 |  |  | 0.34 | ** | 0.11 |
|  | **Age** |  | 0.03 |  | 0.03 |  |  | 0.02 |  | 0.03 |
|  | **Gender** |  | -0.22 |  | 0.47 |  |  | -0.25 |  | 0.48 |
|  | **BMI** |  | 0.00 |  | 0.06 |  |  | -0.01 |  | 0.07 |
| **Model Summary** | |  |  |  |  |  |  |  |  |  |
|  | **Deviance** |  | 120.89 |  |  |  |  | 117.25 |  |  |
|  | **AIC** |  | 136.89 |  |  |  |  | 135.25 |  |  |
|  | **BIC** |  | 157.81 |  |  |  |  | 158.79 |  |  |
|  | ***df*** |  | 93 |  |  |  |  | 92 |  |  |
|  | ***Χ²*** |  | - |  |  |  |  | 3.64 |  |  |
|  | ***p*** |  | - |  |  |  |  | 0.057 |  |  |
|  | **McFadden *R²*** |  | - |  |  |  |  | 0.03 |  |  |
| **Performance** | |  |  |  |  |  |  |  |  |  |
|  | **Accuracy** |  | 0.69 |  |  |  |  | 0.68 |  |  |
|  | **AUC** |  | 0.74 |  |  |  |  | 0.77 |  |  |
|  | **Sensitivity** |  | 0.72 |  |  |  |  | 0.74 |  |  |
|  | **Specificity** |  | 0.66 |  |  |  |  | 0.62 |  |  |

Note: The null model (H0) included HR, LF/HF, HF, cortisol, age, gender, and BMI as explanatory variables, and the alternative model (H1) included SDPP in addition to the explanatory variables in the null model. *SE* = standard error; AIC = Akaike information criterion; BIC = Bayesian information criterion. ****p* < 0.001, ***p* < 0.01, **p* < 0.05. Sample sizes for each are as follows: H0 model = 101, H1 model = 101.

Table S8. Odds ratio of logistic regression models (H0, H1) with difference between groups as the response variable (Recovery)

|  |  |  | **H0 model** | | | |  |  | **H1 model** | | | |
| --- | --- | --- | --- | --- | --- | --- | --- | --- | --- | --- | --- | --- |
|  |  |  | **Odds Ratio** |  | **95% Confidence interval** | |  |  | **Odds Ratio** |  | **95% Confidence interval** | |
|  |  |  |  | **(odds ratio scale)** | |  |  |  | **(odds ratio scale)** | |
|  |  |  |  | **Lower bound** | **Upper bound** |  |  |  | **Lower bound** | **Upper bound** |
| **Coefficients** | |  |  |  |  |  |  |  |  |  |  |  |
|  | **Intercept** |  | 0.06 |  | 0.00 | 19.33 |  |  | 0.11 |  | 0 | 40.13 |
|  | **SDPP Recovery** |  | - |  |  | - |  |  | 1.70 |  | 0.97 | 2.98 |
|  | **HR Recovery** |  | 1.00 |  | 0.95 | 1.05 |  |  | 0.98 |  | 0.93 | 1.03 |
|  | **LF/HF Recovery** |  | 1.15 |  | 0.92 | 1.44 |  |  | 1.15 |  | 0.92 | 1.45 |
|  | **HF Recovery** |  | 1.00 |  | 1.00 | 1.00 |  |  | 1.00 |  | 1.00 | 1.00 |
|  | **Cortisol Load** |  | 1.39 |  | 1.13 | 1.71 |  |  | 1.41 |  | 1.15 | 1.73 |
|  | **Age** |  | 1.03 |  | 0.98 | 1.08 |  |  | 1.02 |  | 0.97 | 1.08 |
|  | **Gender** |  | 0.80 |  | 0.32 | 2.01 |  |  | 0.78 |  | 0.30 | 2.00 |
|  | **BMI** |  | 1.00 |  | 0.88 | 1.13 |  |  | 0.99 |  | 0.87 | 1.13 |

Note: The null model (H0) included HR, LF/HF, HF, cortisol, age, gender, and BMI as explanatory variables, and the alternative model (H1) included SDPP in addition to the explanatory variables in the null model. Sample sizes for each are as follows: H0 model = 101, H1 model = 101.

Table S9. Comparison of logistic regression model with difference between groups as the response variable excluding participants (16 participants) with any of the following: smoking, medication, poor health status, or chronic illness and the results of the estimated coefficients (Load)

|  |  |  | **H0 model** | | |  |  | **H1 model** | | |
| --- | --- | --- | --- | --- | --- | --- | --- | --- | --- | --- |
|  |  |  | **Estimate** |  | ***SE*** |  |  | **Estimate** |  | ***SE*** |
| **Coefficients** | |  |  |  |  |  |  |  |  |  |
|  | **Intercept** |  | -11.84 | ** | 3.76 |  |  | -10.19 | * | 4.41 |
|  | **SDPP Load** |  | - |  | - |  |  | 1.56 | *** | 0.40 |
|  | **HR Load** |  | 0.08 | ** | 0.03 |  |  | 0.04 |  | 0.03 |
|  | **LF/HF Load** |  | 0.08 |  | 0.13 |  |  | 0.01 |  | 0.15 |
|  | **HF Load** |  | 0.00 |  | 0.00 |  |  | 0.00 |  | 0.00 |
|  | **Cortisol Load** |  | 0.27 | ** | 0.10 |  |  | 0.33 | * | 0.13 |
|  | **Age** |  | 0.06 |  | 0.03 |  |  | 0.05 |  | 0.04 |
|  | **Gender** |  | -0.54 |  | 0.56 |  |  | -0.72 |  | 0.77 |
|  | **BMI** |  | 0.04 |  | 0.07 |  |  | -0.03 |  | 0.09 |
| **Model Summary** | |  |  |  |  |  |  |  |  |  |
|  | **Deviance** |  | 93.54 |  |  |  |  | 62.05 |  |  |
|  | **AIC** |  | 109.54 |  |  |  |  | 80.05 |  |  |
|  | **BIC** |  | 129.36 |  |  |  |  | 102.34 |  |  |
|  | ***df*** |  | 80 |  |  |  |  | 79 |  |  |
|  | ***Χ²*** |  | - |  |  |  |  | 31.49 |  |  |
|  | ***p*** |  | - |  |  |  |  | < .001 |  |  |
|  | **McFadden *R²*** |  | - |  |  |  |  | 0.337 |  |  |
| **Performance** | |  |  |  |  |  |  |  |  |  |
|  | **Accuracy** |  | 0.77 |  |  |  |  | 0.85 |  |  |
|  | **AUC** |  | 0.80 |  |  |  |  | 0.92 |  |  |
|  | **Sensitivity** |  | 0.76 |  |  |  |  | 0.89 |  |  |
|  | **Specificity** |  | 0.79 |  |  |  |  | 0.81 |  |  |

Note: The null model (H0) included HR, LF/HF, HF, cortisol, age, gender, and BMI as explanatory variables, and the alternative model (H1) included SDPP in addition to the explanatory variables in the null model. *SE* = standard error; AIC = Akaike information criterion; BIC = Bayesian information criterion. ****p* < 0.001, ***p* < 0.01, **p* < 0.05. Sample sizes for each are as follows: H0 model = 88, H1 model = 88.

Table S10. Odds ratio of logistic regression models (H0, H1) excluding 16 participants with any of the following: smoking, medication, poor health, or chronic illness with difference between groups as the response variable (Load)

|  |  |  | **H0 model** | | | |  |  | **H1 model** | | | |
| --- | --- | --- | --- | --- | --- | --- | --- | --- | --- | --- | --- | --- |
|  |  |  | **Odds Ratio** |  | **95% Confidence interval** | |  |  | **Odds Ratio** |  | **95% Confidence interval** | |
|  |  |  |  | **(odds ratio scale)** | |  |  |  | **(odds ratio scale)** | |
|  |  |  |  | **Lower bound** | **Upper bound** |  |  |  | **Lower bound** | **Upper bound** |
| **Coefficients** | |  |  |  |  |  |  |  |  |  |  |  |
|  | **Intercept** |  | 7.20×10-6 |  | 0.00 | 0.01 |  |  | 3.74×10-5 |  | 0 | 0.21 |
|  | **SDPP Load** |  | - |  |  | - |  |  | 4.75 |  | 2.16 | 10.42 |
|  | **HR Load** |  | 1.08 |  | 1.03 | 1.14 |  |  | 1.04 |  | 0.97 | 1.11 |
|  | **LF/HF Load** |  | 1.08 |  | 0.84 | 1.40 |  |  | 1.01 |  | 0.75 | 1.34 |
|  | **HF Load** |  | 1.00 |  | 1.00 | 1.01 |  |  | 1.00 |  | 1.00 | 1.01 |
|  | **Cortisol Load** |  | 1.31 |  | 1.08 | 1.58 |  |  | 1.39 |  | 1.07 | 1.81 |
|  | **Age** |  | 1.06 |  | 1.00 | 1.13 |  |  | 1.05 |  | 0.98 | 1.14 |
|  | **Gender** |  | 0.58 |  | 0.20 | 1.73 |  |  | 0.49 |  | 0.11 | 2.21 |
|  | **BMI** |  | 1.05 |  | 0.92 | 1.19 |  |  | 0.97 |  | 0.81 | 1.17 |

Note: The null model (H0) included HR, LF/HF, HF, cortisol, age, gender, and BMI as explanatory variables, and the alternative model (H1) included SDPP in addition to the explanatory variables in the null model. Sample size for each is as follows: H0 model = 88, H1 model = 88.

Table S11. Comparison of the multilevel analysis model with POMS2 (AH: anger-hostility) as the response variable and the results of the estimated coefficients

|  |  |  | **H0 model** | | |  |  | **H1 model** | | |
| --- | --- | --- | --- | --- | --- | --- | --- | --- | --- | --- |
|  |  |  | **Estimate** |  | ***SE*** |  |  | **Estimate** |  | ***SE*** |
| **Coefficients** | |  |  |  |  |  |  |  |  |  |
|  | **Intercept** |  | 41.28 | *** | 0.75 |  |  | 41.28 | *** | 0.75 |
|  | **SDPP** |  | - |  | - |  |  | 0.04 |  | 0.84 |
|  | **HR** |  | 2.12 | *** | 0.61 |  |  | 2.09 | * | 0.86 |
|  | **LF/HF** |  | 0.00 | *** | 0.58 |  |  | -0.01 |  | 0.60 |
|  | **HF** |  | 0.91 |  | 0.57 |  |  | 0.90 |  | 0.61 |
|  | **Cortisol** |  | 0.55 |  | 0.57 |  |  | 0.54 |  | 0.57 |
| **Model Summary** | |  |  |  |  |  |  |  |  |  |
|  | **Deviance** |  | 1065.27 |  |  |  |  | 1065.26 |  |  |
|  | **AIC** |  | 1079.27 |  |  |  |  | 1081.26 |  |  |
|  | **BIC** |  | 1100.61 |  |  |  |  | 1105.66 |  |  |
|  | ***df*** |  | 7 |  |  |  |  | 8 |  |  |
|  | **log Lik.** |  | -532.63 |  |  |  |  | -532.63 |  |  |
|  | ***Χ²*** |  | - |  |  |  |  | 0.00 |  |  |
|  | ***p*** |  | - |  |  |  |  | 0.964 |  |  |

Note: The null model (H0) included HR, LF/HF, HF, and cortisol as explanatory variables, and the alternative model (H1) included SDPP in addition to the explanatory variables in the null model. Standardizing scores (subtracting the mean values of Baseline, Load, and Recovery for each participant from each value, which was then divided by the standard deviation) were performed for explanatory variables. *SE* = standard error; AIC = Akaike information criterion; BIC = Bayesian information criterion; log Lik. = log-likelihood ratio. ****p* < 0.001, ***p* < 0.01, **p* < 0.05. The sample sizes for each are as follows: H0 model = 52, H1 model = 52.

Table S12. Comparison of the multilevel analysis model with POMS 2(CB: Confusion-Bewilderment) as the response variable and the results of the estimated coefficients

|  |  |  | **H0 model** | | |  |  | **H1 model** | | |
| --- | --- | --- | --- | --- | --- | --- | --- | --- | --- | --- |
|  |  |  | **Estimate** |  | ***SE*** |  |  | **Estimate** |  | ***SE*** |
| **Coefficients** | |  |  |  |  |  |  |  |  |  |
|  | **Intercept** |  | 49.51 | *** | 1.15 |  |  | 49.51 | *** | 1.15 |
|  | **SDPP** |  | - |  | - |  |  | 4.44 | *** | 1.15 |
|  | **HR** |  | 6.30 | *** | 0.88 |  |  | 3.13 | ** | 1.16 |
|  | **LF/HF** |  | 1.14 |  | 0.85 |  |  | 0.42 |  | 0.81 |
|  | **HF** |  | 1.48 |  | 0.82 |  |  | 0.38 |  | 0.82 |
|  | **Cortisol** |  | 1.76 |  | 0.82 |  |  | 1.33 |  | 0.78 |
| **Model Summary** | |  |  |  |  |  |  |  |  |  |
|  | **Deviance** |  | 1186.57 |  |  |  |  | 1172.53 |  |  |
|  | **AIC** |  | 1200.57 |  |  |  |  | 1188.53 |  |  |
|  | **BIC** |  | 1221.92 |  |  |  |  | 1212.93 |  |  |
|  | ***df*** |  | 7 |  |  |  |  | 8 |  |  |
|  | **log Lik.** |  | -593.29 |  |  |  |  | -586.27 |  |  |
|  | ***Χ²*** |  | - |  |  |  |  | 14.04 |  |  |
|  | ***p*** |  | - |  |  |  |  | < .001 |  |  |

Note: The null model (H0) included HR, LF/HF, HF, and cortisol as explanatory variables, and the alternative model (H1) included SDPP in addition to the explanatory variables in the null model. Standardizing scores (subtracting the mean values of Baseline, Load, and Recovery for each participant from each value, which was then divided by the standard deviation) were performed for explanatory variables. *SE* = standard error; AIC = Akaike information criterion; BIC = Bayesian information criterion; log Lik. = log-likelihood ratio. ****p* < 0.001, ***p* < 0.01, **p* < 0.05. The sample sizes for each are as follows: H0 model = 52, H1 model = 52.

Table S13. Comparison of multilevel analysis models with POMS2 (DD: Depression-Dejection) as the response variable and results of estimated coefficients.

|  |  |  | **H0 model** | | |  |  | **H1 model** | | |
| --- | --- | --- | --- | --- | --- | --- | --- | --- | --- | --- |
|  |  |  | **Estimate** |  | ***SE*** |  |  | **Estimate** |  | ***SE*** |
| **Coefficients** | |  |  |  |  |  |  |  |  |  |
|  | **Intercept** |  | 47.51 | ** | 1.16 |  |  | 47.51 | *** | 1.16 |
|  | **SDPP** |  | - |  | - |  |  | 2.13 | * | 0.93 |
|  | **HR** |  | 1.93 | ** | 0.68 |  |  | 0.41 |  | 0.94 |
|  | **LF/HF** |  | 0.30 |  | 0.66 |  |  | -0.04 |  | 0.66 |
|  | **HF** |  | 0.82 |  | 0.64 |  |  | 0.29 |  | 0.66 |
|  | **Cortisol** |  | 1.07 |  | 0.64 |  |  | 0.86 |  | 0.63 |
| **Model Summary** | |  |  |  |  |  |  |  |  |  |
|  | **Deviance** |  | 1134.31 |  |  |  |  | 1129.14 |  |  |
|  | **AIC** |  | 1148.31 |  |  |  |  | 1145.14 |  |  |
|  | **BIC** |  | 1169.65 |  |  |  |  | 1169.54 |  |  |
|  | ***df*** |  | 7 |  |  |  |  | 8 |  |  |
|  | **log Lik.** |  | -567.15 |  |  |  |  | -564.57 |  |  |
|  | ***Χ²*** |  | - |  |  |  |  | 5.16 |  |  |
|  | ***p*** |  | - |  |  |  |  | 0.023 |  |  |

Note: The null model (H0) included HR, LF/HF, HF, and cortisol as explanatory variables, and the alternative model (H1) included SDPP in addition to the explanatory variables in the null model. Standardizing scores (subtracting the mean values of Baseline, Load, and Recovery for each participant from each value, which was then divided by the standard deviation) were performed for explanatory variables. *SE* = standard error; AIC = Akaike information criterion; BIC = Bayesian information criterion; log Lik. = log-likelihood ratio. ****p* < 0.001, ***p* < 0.01, **p* < 0.05. The sample sizes for each are as follows: H0 model = 52, H1 model = 52.

Table S14. Comparison of the multilevel analysis model with POMS2 (FI: Fatigue-Inertia) as the response variable and the results of the estimated coefficients

|  |  |  | **H0 model** | | |  |  | **H1 model** | | |
| --- | --- | --- | --- | --- | --- | --- | --- | --- | --- | --- |
|  |  |  | **Estimate** |  | ***SE*** |  |  | **Estimate** |  | ***SE*** |
| **Coefficients** | |  |  |  |  |  |  |  |  |  |
|  | **Intercept** |  | 44.53 | *** | 1.27 |  |  | 44.53 | *** | 1.27 |
|  | **SDPP** |  | - |  | - |  |  | 2.77 | * | 1.12 |
|  | **HR** |  | 4.60 | *** | 0.83 |  |  | 2.62 | * | 1.13 |
|  | **LF/HF** |  | 1.17 |  | 0.79 |  |  | 0.72 |  | 0.79 |
|  | **HF** |  | 1.15 |  | 0.77 |  |  | 0.46 |  | 0.80 |
|  | **Cortisol** |  | 0.88 |  | 0.77 |  |  | 0.61 |  | 0.76 |
| **Model Summary** | |  |  |  |  |  |  |  |  |  |
|  | **Deviance** |  | 1184.40 |  |  |  |  | 1178.43 |  |  |
|  | **AIC** |  | 1198.40 |  |  |  |  | 1194.43 |  |  |
|  | **BIC** |  | 1219.75 |  |  |  |  | 1218.83 |  |  |
|  | ***df*** |  | 7 |  |  |  |  | 8 |  |  |
|  | **log Lik.** |  | -592.20 |  |  |  |  | -589.22 |  |  |
|  | ***Χ²*** |  | - |  |  |  |  | 5.97 |  |  |
|  | ***p*** |  | - |  |  |  |  | 0.015 |  |  |

Note: The null model (H0) included HR, LF/HF, HF, and cortisol as explanatory variables, and the alternative model (H1) included SDPP in addition to the explanatory variables in the null model. Standardizing scores (subtracting the mean values of Baseline, Load, and Recovery for each participant from each value, which was then divided by the standard deviation) were performed for explanatory variables. *SE* = standard error; AIC = Akaike information criterion; BIC = Bayesian information criterion; log Lik. = log-likelihood ratio. ****p* < 0.001, ***p* < 0.01, **p* < 0.05. The sample sizes for each are as follows: H0 model = 52, H1 model = 52.

Table S15. Comparison of the multilevel analysis model with POMS2 (TA: Tension-Anxiety) as the response variable and the results of the estimated coefficients

|  |  |  | **H0 model** | | |  |  | **H1 model** | | |
| --- | --- | --- | --- | --- | --- | --- | --- | --- | --- | --- |
|  |  |  | **Estimate** |  | ***SE*** |  |  | **Estimate** |  | ***SE*** |
| **Coefficients** | |  |  |  |  |  |  |  |  |  |
|  | **Intercept** |  | 45.25 | *** | 1.18 |  |  | 45.25 | *** | 1.18 |
|  | **SDPP** |  | - |  | - |  |  | 2.74 | * | 1.24 |
|  | **HR** |  | 6.51 | *** | 0.91 |  |  | 4.56 | *** | 1.25 |
|  | **LF/HF** |  | -0.06 |  | 0.87 |  |  | -0.50 |  | 0.88 |
|  | **HF** |  | 0.94 |  | 0.85 |  |  | 0.26 |  | 0.89 |
|  | **Cortisol** |  | 1.90 |  | 0.85 |  |  | 1.63 |  | 0.84 |
| **Model Summary** | |  |  |  |  |  |  |  |  |  |
|  | **Deviance** |  | 1195.54 |  |  |  |  | 1190.74 |  |  |
|  | **AIC** |  | 1209.54 |  |  |  |  | 1206.74 |  |  |
|  | **BIC** |  | 1230.89 |  |  |  |  | 1231.14 |  |  |
|  | ***df*** |  | 7 |  |  |  |  | 8 |  |  |
|  | **log Lik.** |  | -597.77 |  |  |  |  | -595.37 |  |  |
|  | ***Χ²*** |  | - |  |  |  |  | 4.80 |  |  |
|  | ***p*** |  | - |  |  |  |  | 0.028 |  |  |

Note: The null model (H0) included HR, LF/HF, HF, and cortisol as explanatory variables, and the alternative model (H1) included SDPP in addition to the explanatory variables in the null model. Standardizing scores (subtracting the mean values of Baseline, Load, and Recovery for each participant from each value, which was then divided by the standard deviation) were performed for explanatory variables. *SE* = standard error; AIC = Akaike information criterion; BIC = Bayesian information criterion; log Lik. = log-likelihood ratio. ****p* < 0.001, ***p* < 0.01, **p* < 0.05. The sample sizes for each are as follows: H0 model = 52, H1 model = 52.

Table S16. Comparison of the multilevel analysis model with POMS2 (VA: Vigour-Activity) as the response variable and the results of the estimated coefficients

|  |  |  | **H0 model** | | |  |  | **H1 model** | | |
| --- | --- | --- | --- | --- | --- | --- | --- | --- | --- | --- |
|  |  |  | **Estimate** |  | ***SE*** |  |  | **Estimate** |  | ***SE*** |
| **Coefficients** | |  |  |  |  |  |  |  |  |  |
|  | **Intercept** |  | 44.46 | *** | 1.27 |  |  | 44.46 | *** | 1.27 |
|  | **SDPP** |  | - |  | - |  |  | -1.49 |  | 0.96 |
|  | **HR** |  | -1.74 | * | 0.70 |  |  | -0.67 |  | 0.98 |
|  | **LF/HF** |  | -0.84 |  | 0.67 |  |  | -0.59 |  | 0.68 |
|  | **HF** |  | -0.36 |  | 0.66 |  |  | 0.01 |  | 0.69 |
|  | **Cortisol** |  | 0.24 |  | 0.65 |  |  | 0.39 |  | 0.65 |
| **Model Summary** | |  |  |  |  |  |  |  |  |  |
|  | **Deviance** |  | 1149.55 |  |  |  |  | 1147.18 |  |  |
|  | **AIC** |  | 1163.55 |  |  |  |  | 1163.18 |  |  |
|  | **BIC** |  | 1184.90 |  |  |  |  | 1187.58 |  |  |
|  | ***df*** |  | 7 |  |  |  |  | 8 |  |  |
|  | **log Lik.** |  | -574.78 |  |  |  |  | -573.59 |  |  |
|  | ***Χ²*** |  | - |  |  |  |  | 2.38 |  |  |
|  | ***p*** |  | - |  |  |  |  | 0.123 |  |  |

Note: The null model (H0) included HR, LF/HF, HF, and cortisol as explanatory variables, and the alternative model (H1) included SDPP in addition to the explanatory variables in the null model. Standardizing scores (subtracting the mean values of Baseline, Load, and Recovery for each participant from each value, which was then divided by the standard deviation) were performed for explanatory variables. *SE* = standard error; AIC = Akaike information criterion; BIC = Bayesian information criterion; log Lik. = log-likelihood ratio. ****p* < 0.001, ***p* < 0.01, **p* < 0.05. The sample sizes for each are as follows: H0 model = 52, H1 model = 52.

Table S17. Comparison of the multilevel analysis model with POMS2 (F: Friendliness) as the response variable and the results of the estimated coefficients

|  |  |  | **H0 model** | | |  |  | **H1 model** | | |
| --- | --- | --- | --- | --- | --- | --- | --- | --- | --- | --- |
|  |  |  | **Estimate** |  | ***SE*** |  |  | **Estimate** |  | ***SE*** |
| **Coefficients** | |  |  |  |  |  |  |  |  |  |
|  | **Intercept** |  | 39.31 | *** | 1.41 |  |  | 39.31 | *** | 1.41 |
|  | **SDPP** |  | - |  | - |  |  | -1.59 |  | 1.03 |
|  | **HR** |  | -1.31 |  | 0.75 |  |  | -0.18 |  | 1.04 |
|  | **LF/HF** |  | -1.35 |  | 0.72 |  |  | -1.10 |  | 0.73 |
|  | **HF** |  | -0.84 |  | 0.70 |  |  | -0.45 |  | 0.74 |
|  | **Cortisol** |  | -0.74 |  | 0.70 |  |  | -0.58 |  | 0.70 |
| **Model Summary** | |  |  |  |  |  |  |  |  |  |
|  | **Deviance** |  | 1173.37 |  |  |  |  | 1171.01 |  |  |
|  | **AIC** |  | 1187.37 |  |  |  |  | 1187.01 |  |  |
|  | **BIC** |  | 1208.72 |  |  |  |  | 1211.41 |  |  |
|  | ***df*** |  | 7 |  |  |  |  | 8 |  |  |
|  | **log Lik.** |  | -586.69 |  |  |  |  | -585.50 |  |  |
|  | ***Χ²*** |  | - |  |  |  |  | 2.37 |  |  |
|  | ***p*** |  | - |  |  |  |  | 0.124 |  |  |

Note: The null model (H0) included HR, LF/HF, HF, and cortisol as explanatory variables, and the alternative model (H1) included SDPP in addition to the explanatory variables in the null model. Standardizing scores (subtracting the mean values of Baseline, Load, and Recovery for each participant from each value, which was then divided by the standard deviation) were performed for explanatory variables. *SE* = standard error; AIC = Akaike information criterion; BIC = Bayesian information criterion; log Lik. = log-likelihood ratio. ****p* < 0.001, ***p* < 0.01, **p* < 0.05. The sample sizes are for each as follows: H0 model = 52, H1 model = 52.

Table S18. Comparison of multilevel analysis models with STAI (State Anxiety) excepting HRV as explanatory variable and the results of estimated coefficients

|  |  |  | **H0 model** | | |  |  | **H1 model** | | |
| --- | --- | --- | --- | --- | --- | --- | --- | --- | --- | --- |
|  |  |  | **Estimate** |  | ***SE*** |  |  | **Estimate** |  | ***SE*** |
| **Coefficients** | |  |  |  |  |  |  |  |  |  |
|  | **Intercept** |  | 45.48 | *** | 0.96 |  |  | 45.48 | *** | 0.96 |
|  | **SDPP** |  | - |  | - |  |  | 2.51 | * | 0.97 |
|  | **HR** |  | 5.50 | *** | 0.74 |  |  | 3.86 | *** | 0.96 |
|  | **Cortisol** |  | 0.99 |  | 0.74 |  |  | 0.63 |  | 0.73 |
| **Model Summary** | |  |  |  |  |  |  |  |  |  |
|  | **Deviance** |  | 1252.84 |  |  |  |  | 1246.36 |  |  |
|  | **AIC** |  | 1262.84 |  |  |  |  | 1258.36 |  |  |
|  | **BIC** |  | 1278.46 |  |  |  |  | 1277.10 |  |  |
|  | ***df*** |  | 5 |  |  |  |  | 6 |  |  |
|  | **log Lik.** |  | -626.42 |  |  |  |  | -623.18 |  |  |
|  | ***Χ²*** |  | - |  |  |  |  | 6.48 |  |  |
|  | ***p*** |  | - |  |  |  |  | 0.01 |  |  |

Note: The null model (H0) included HR and cortisol as explanatory variable, and the alternative model (H1) included SDPP in addition to the explanatory variables in the null model. Standardizing scores (subtracting the mean values of Baseline, Load, and Recovery for each participant from each value, which was then divided by the standard deviation) were performed for explanatory variables. *SE* = standard error; AIC = Akaike information criterion; BIC = Bayesian information criterion; log Lik. = log-likelihood ratio. ****p* < 0.001, ***p* < 0.01, **p* < 0.05. The sample sizes for each are as follows: H0 model = 52, H1 model = 52.

Table S19. Comparison of the multilevel analysis model with the STAI (state anxiety) including SDPP, HR and cortisol as the response variables, with adjustment of the number of cases (n=53) excluding missing data of participants for whom LF/HF and HF were not available, and the results of estimated coefficients

|  |  |  | **H0 model** | | |  |  | **H1 model** | | |
| --- | --- | --- | --- | --- | --- | --- | --- | --- | --- | --- |
|  |  |  | **Estimate** |  | ***SE*** |  |  | **Estimate** |  | ***SE*** |
| **Coefficients** | |  |  |  |  |  |  |  |  |  |
|  | **Intercept** |  | 45.58 | *** | 1.03 |  |  | 45.58 | *** | 1.03 |
|  | **SDPP** |  | - |  |  |  |  | 1.92 |  | 1.06 |
|  | **HR** |  | 5.78 | *** | 0.77 |  |  | 4.46 | *** | 1.05 |
|  | **Cortisol** |  | 1.05 |  | 0.77 |  |  | 0.78 |  | 0.77 |
| **Model Summary** | |  |  |  |  |  |  |  |  |  |
|  | **Deviance** |  | 1163.89 |  |  |  |  | 1160.67 |  |  |
|  | **AIC** |  | 1173.89 |  |  |  |  | 1172.67 |  |  |
|  | **BIC** |  | 1189.14 |  |  |  |  | 1190.97 |  |  |
|  | ***df*** |  | 5 |  |  |  |  | 6 |  |  |
|  | **log Lik.** |  | -581.95 |  |  |  |  | -580.34 |  |  |
|  | ***Χ²*** |  | - |  |  |  |  | 3.220 |  |  |
|  | ***p*** |  | - |  |  |  |  | 0.07274 |  |  |

Note: The null model (H0) included HR and cortisol as explanatory variable, and the alternative model (H1) included SDPP in addition to the explanatory variables in the null model. Missing data of participants for whom LF/HF and HF were not available were excluded from both H0 and H1, and the analysis was performed adjusting the number of cases. Standardizing scores (subtracting the mean values of Baseline, Load, and Recovery for each participant from each value, which was then divided by the standard deviation) were performed for explanatory variables. *SE* = standard error; AIC = Akaike information criterion; BIC = Bayesian information criterion; log Lik. = log-likelihood ratio. ****p* < 0.001, ***p* < 0.01, **p* < 0.05. The sample sizes for each are: H0 model = 52, H1 model = 52.
